# Supplementary material for: Room-temperature half-metals induced via chemical surface modification: 2D Mn2Se2 monolayer
Source: Royal Society of Chemistry journal article supplement (doi:10.1039/d3cp00922j), 2023-01-01
Supplement: d3cp00922j1.pdf [file d3cp00922j1.pdf]

## Supporting Information

### **Room-Temperature Half-Metals Induced by Chemical Surface Modification: 2D Mn<sub>2</sub>Se<sub>2</sub> monolayer**

Zhe Wang, Yanqiu Zheng, Ji Chen, Yun Wang, Yu Liang, Xiang Li, Fang Wu\*

College of Information Science and Technology, Nanjing Forestry University, Nanjing, Jiangsu  
210037, P. R. China

E-mail: [fangwu@njfu.edu.cn](mailto:fangwu@njfu.edu.cn)

**Table S1.** Optimized lattice parameters  $a$  and  $b$  (Å), magnetic moment  $M(\mu_B)$  of the Mn atom, energy difference (per Mn atom) between the FM and AFM states  $\Delta E = E_{FM} - E_{AFM}$  (meV) for  $Mn_2Se_2$  calculated using the GGA+U method with different U values. The available experimental data are listed in parentheses for comparison.

| U (eV) | a, b(Å)      | M( $\mu_B$ )/Mn       | $\Delta E$ (meV) |
|--------|--------------|-----------------------|------------------|
| 1      | 4.207        | $\pm 4.160$           | 351              |
| 2      | 4.264        | $\pm 4.345$           | 258              |
| 2.3    | 4.282 (4.28) | $\pm 4.386(\pm 4.38)$ | 236(232)         |
| 2.5    | 4.291        | $\pm 4.410$           | 221              |
| 3      | 4.309        | $\pm 4.461$           | 189              |
| 4      | 4.347        | $\pm 4.546$           | 155              |
| 5      | 4.375        | $\pm 4.609$           | 113              |

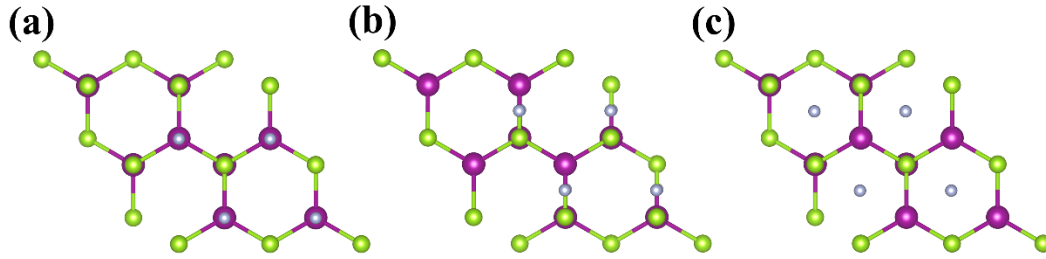

**Figure S1.** Schematic structures of  $Mn_2Se_2$  monolayers modified with X atoms (X=F, Cl, Br, I and S) at the several adsorption sites (a) on-top, (b) bridge, (c) hollow. The purple, green, and gray balls represent Mn, Se, and X atoms, respectively.

**Table S2.** The total energies (in eV) of  $Mn_2Se_2$  monolayer with F, Cl, Br, I and S adsorption at different adsorption sites (i.e. on-top, bridge and hollow sites).

| adsorption sites | on-top   | bridge   | hollow   |
|------------------|----------|----------|----------|
| $Mn_2Se_2F_2$    | -144.632 | -144.388 | -144.486 |
| $Mn_2Se_2Cl_2$   | -132.804 | -132.548 | -132.664 |
| $Mn_2Se_2Br_2$   | -128.816 | -128.601 | -128.716 |
| $Mn_2Se_2I_2$    | -124.936 | -124.432 | -123.992 |
| $Mn_2Se_2S_2$    | -137.248 | -136.776 | -136.410 |

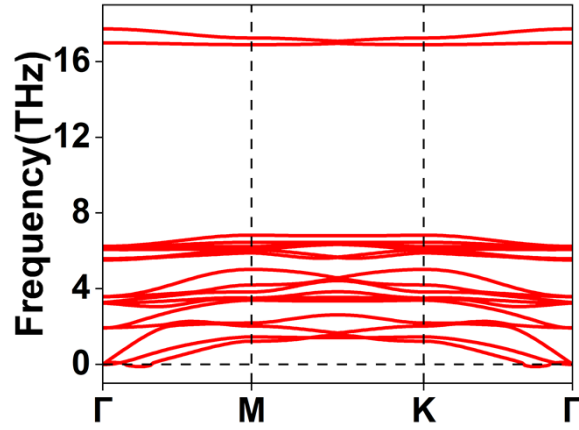

**Figure S2.** Phonon dispersion curves of  $\text{Mn}_2\text{Se}_2\text{F}_2$  monolayer.

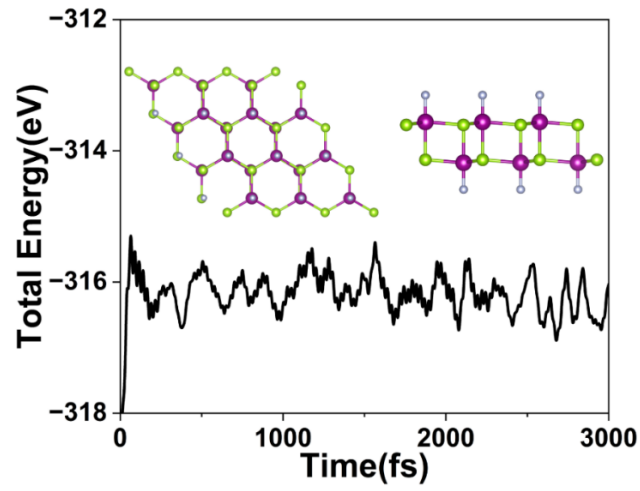

**Figure S3.** Evolution of total energy for the  $\text{Mn}_2\text{Se}_2\text{F}_2$  monolayer at 300 K from AIMD simulations. Here, top views and side views of the corresponding geometrical structures after the AIMD simulation are shown.

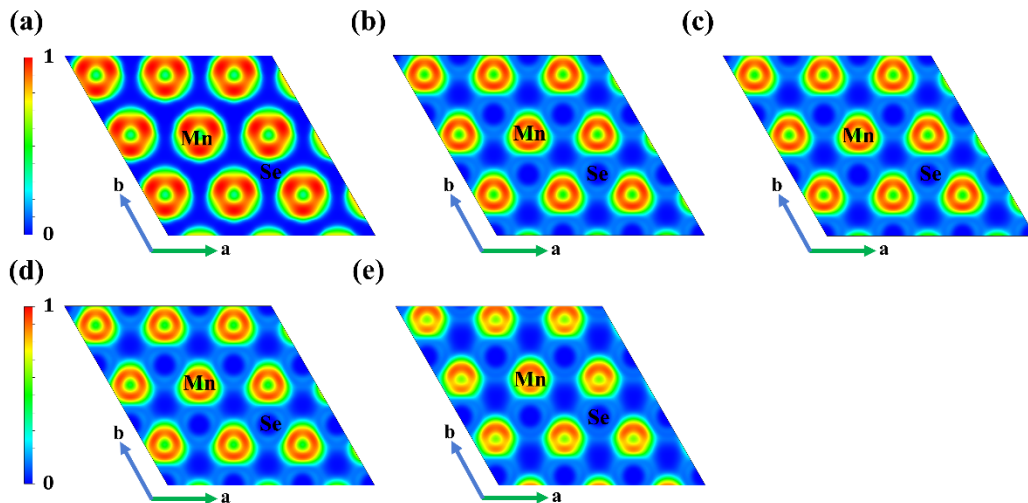

**Figure S4.** Electron localization functions (ELF) of (a)  $\text{Mn}_2\text{Se}_2\text{F}_2$ , (b)  $\text{Mn}_2\text{Se}_2\text{Cl}_2$ , (c)  $\text{Mn}_2\text{Se}_2\text{Br}_2$ , (d)  $\text{Mn}_2\text{Se}_2\text{I}_2$  and (e)  $\text{Mn}_2\text{Se}_2\text{S}_2$  monolayers.

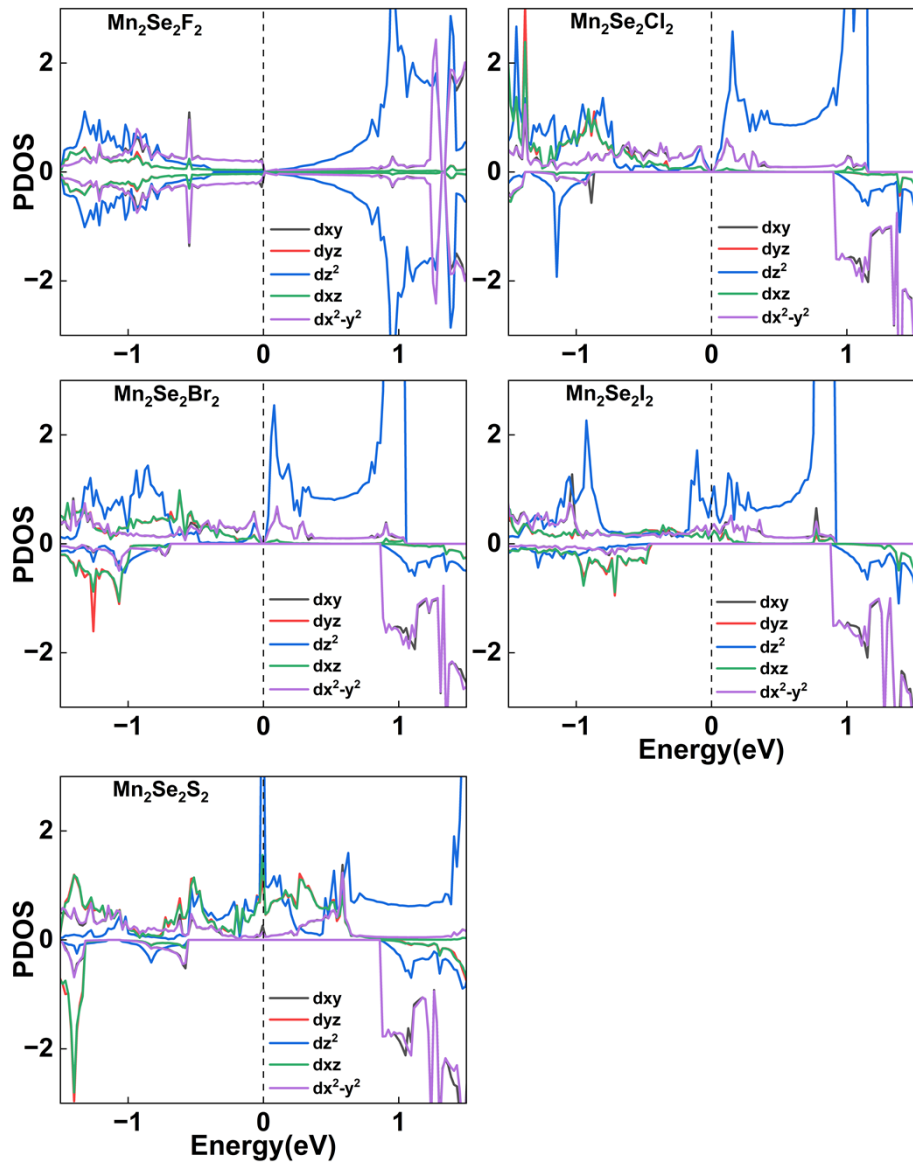

Figure S5. The PDOS of Mn d orbitals for Mn<sub>2</sub>Se<sub>2</sub> derivatives monolayer.
